# Supplementary material for: The clinical treatment and outcome of cerebellopontine angle medulloblastoma: a retrospective study of 15 cases
Source: PubMed Central journal article supplement (PMC7300107; doi:10.1038/s41598-020-66585-7), 2020-06-17
Supplement: 41598_2020_66585_MOESM1_ESM.pdf [file 41598_2020_66585_MOESM1_ESM.pdf]

**The clinical treatment and outcome of cerebellopontine angle medulloblastoma:  
a retrospective study of 15 cases**

Tao Wu<sup>1,4</sup>, Pei-ran Qu<sup>1,3,4</sup>, Shun Zhang<sup>2</sup>, Shi-wei Li<sup>1</sup>, Jing Zhang<sup>1</sup>, Bo Wang<sup>2</sup>, Pinan  
Liu<sup>1,2</sup>, Chun-de Li<sup>1,2</sup>, and Fu Zhao<sup>1,2</sup>

**Supplementary table 1.** The comparison of clinical characteristics between adult and pediatric cerebellopontine angle medulloblastomas

| Characteristics                   | Children (n=3)      | Adults (n=12)       | <i>P</i> * |
|-----------------------------------|---------------------|---------------------|------------|
|                                   | No. of patients (%) | No. of patients (%) |            |
| <b>Gender</b>                     |                     |                     |            |
| Female                            | 3 (100)             | 4 (33)              | 0.077      |
| Male                              | 0 (0)               | 8 (67)              |            |
| <b>Ataxia</b>                     |                     |                     |            |
| Yes                               | 2 (67)              | 12 (100)            | 0.200      |
| No                                | 1 (33)              | 0 (0)               |            |
| <b>Diplopia</b>                   |                     |                     |            |
| Yes                               | 0 (0)               | 4 (33)              | 0.516      |
| No                                | 3 (100)             | 8 (67)              |            |
| <b>Hearing loss</b>               |                     |                     |            |
| Yes                               | 0 (0)               | 4 (33)              | 0.516      |
| No                                | 3 (100)             | 8 (67)              |            |
| <b>Cystic</b>                     |                     |                     |            |
| Yes                               | 3 (100)             | 6 (50)              | 0.229      |
| No                                | 0 (0)               | 6 (50)              |            |
| <b>Hemorrhage/ mineralization</b> |                     |                     |            |
| Yes                               | 2 (67)              | 3 (25)              | 0.242      |

---

|                           |         |        |       |
|---------------------------|---------|--------|-------|
| No                        | 1 (33)  | 9 (75) |       |
| <b>Necrosis</b>           |         |        |       |
| Yes                       | 2 (67)  | 6 (50) | 1.000 |
| No                        | 1 (33)  | 6 (50) |       |
| <b>Enhancement</b>        |         |        |       |
| Solid                     | 1 (33)  | 7 (58) | 0.569 |
| Heterogeneous or minimal  | 2 (67)  | 5 (42) |       |
| <b>Margin</b>             |         |        |       |
| Well-margin               | 1 (33)  | 7 (58) | 0.569 |
| Ill-margin                | 2 (67)  | 5 (42) |       |
| <b>Histology</b>          |         |        |       |
| Classic MB                | 3 (100) | 9 (75) | 1.000 |
| DNMB                      | 0 (0)   | 3 (25) |       |
| <b>Molecular subgroup</b> |         |        |       |
| WNT                       | 1 (33)  | 4 (33) | 1.000 |
| SHH                       | 2 (67)  | 8 (67) |       |

---

**Abbreviations:** PCN, posterior cranial nerves; DN, desmoplastic nodular.

\* Fisher's exact test.
